# Supplementary material for: OsMGT1 Confers Resistance to Magnesium Deficiency By Enhancing the Import of Mg in Rice
Source: PubMed Central journal article supplement (PMC6337559; doi:10.3390/ijms20010207), 2019-01-08
Supplement: ijms-20-00207-s001.pdf [file ijms-20-00207-s001.pdf]

Supplemental Table 1. Primers used for vector construction and Real Time PCR

| Primer      | Forward primer               | Reverse primer               |
|-------------|------------------------------|------------------------------|
| Ubi: OsMGT1 | TAGGTACCATGGAGCGGAGGGCGCAGCC | CGGGATCCTCACTGCAGGATCTTGCTCT |
| OsMGT1-RT   | CAAGTACGCATCTGTTGATC         | CGCGTATTCACGGATATGGTACAGGG   |
| OsMGT2-RT   | AAGTAGGCTAGTTGCTCTGA         | AGAACCATAGGAATCCGCAG         |
| OsMGT3-RT   | CAAGCATTGGTTGAGCTGGG         | GGAACGGAGCACTCCATGTT         |
| OsMGT4-RT   | TGCACCTAACGGAGAAGCTC         | TGTCCTCCACGTACTIONCCCTCA     |
| OsMGT5-RT   | GCAGAATTTACTGATATGGA         | CAGCTCATCAAGTGCCGGAT         |
| OsMGT6-RT   | CAGGTGCTGGAGCTCGCACT         | GTCTTCCACGTCATTATCCA         |
| OsMGT7-RT   | AGGTACGTCGCTGAGCTGCA         | AGGATAAGCGTCAGCCTCCA         |
| OsMGT8-RT   | GACGATGACATGGCTGATCT         | CAATTTGCATGAAGTATGCC         |
| OsMGT9-RT   | GGAATCCAGGCGATGCCGTT         | TTCCAGCACCAGCACCTCAT         |
